# Supplementary material for: Developing Regional Mental Health Priorities: Mixed-Methods Needs Assessment of Eight States in the Southeastern United States
Source: Atypon-hosted journal article supplement (doi:10.1176/appi.ps.202000141), 2020-11-25
Supplement: appi.ps.202000141.ds001.pdf [file appi.ps.202000141.ds001.pdf]

**Developing regional mental health priorities: A mixed-methods needs assessment of eight states in the southeast United States**

Elizabeth Reisinger Walker, PhD, MPH, Emily Moore, MPH, Stephanie Tapscott, MS, Melissa Alperin, EdD, MPH, Janet R Cummings, PhD, Benjamin G. Druss, MD, MPH

**Supplemental Table. Current initiatives and needs for the six regional mental health priorities for the eight Southeast states**

| <b>Regional Mental Health Priority Area</b> | <b>Current Initiatives</b>                                                                                                                                                                                                                                                                                                                                                                                                      | <b>Needs</b>                                                                                                                                                                                                                                                                                                                                          |
|---------------------------------------------|---------------------------------------------------------------------------------------------------------------------------------------------------------------------------------------------------------------------------------------------------------------------------------------------------------------------------------------------------------------------------------------------------------------------------------|-------------------------------------------------------------------------------------------------------------------------------------------------------------------------------------------------------------------------------------------------------------------------------------------------------------------------------------------------------|
| <b>Mental Health Workforce</b>              | <ul style="list-style-type: none"> <li>• Workforce capacity building efforts, including internal knowledge transfer and building the mental health workforce pipeline</li> </ul>                                                                                                                                                                                                                                                | <ul style="list-style-type: none"> <li>• Fill behavioral health positions in community mental health clinics and specialty sectors, including criminal justice and school-based mental health</li> <li>• Identify and implement effective strategies for recruitment, retention, and leadership development of the mental health workforce</li> </ul> |
| <b>School-based Mental Health</b>           | <ul style="list-style-type: none"> <li>• All states have initiatives to increase the number of mental health staff in schools and strengthen the continuum of care from schools to clinics</li> <li>• Recent school safety legislation and policy includes mandatory professional development in suicide prevention for school personnel and funding for expansion and coordination of school mental health services</li> </ul> | <ul style="list-style-type: none"> <li>• Expand mental health services in schools</li> <li>• Improve coordination between schools and community mental health services</li> <li>• Identify and implement behavioral health assessments in schools</li> <li>• Sustainable methods for financing school mental health services</li> </ul>               |
| <b>Suicide Prevention</b>                   | <ul style="list-style-type: none"> <li>• Seven states have developed and are implementing state suicide prevention plans. Plans aim to coordinate efforts across state agencies, provide trainings in evidence-based practices for</li> </ul>                                                                                                                                                                                   | <ul style="list-style-type: none"> <li>• Expand evidence-based services, focusing on priority populations such as veterans</li> <li>• Reduce access to lethal means</li> </ul>                                                                                                                                                                        |

identifying and intervening with people at risk for suicide behaviors, implement programs to promote wellness, and improve public knowledge of risk and protective factors for suicide.

- All states have initiatives for crisis services, such as mobile crisis response teams and stabilization units

### **Peer Workforce**

- All states have peer certification programs
- Peer support services are reimbursable through Medicaid in 7 states
- Initiatives to train peers to address whole health and transitions of care
- Expand peer workforce into the behavioral healthcare system and specialty services, including hospitals, emergency rooms, and prisons
- Educate mental health providers and managers on the role and value of peer specialists and on how to best integrate peers onto their teams

### **Criminal Justice and Mental Health**

- All states implement programs to address mental health issues in the criminal justice system
- Programs include training for crisis intervention teams, pre-arrest diversion programs, and reintegration program
- Strengthen collaborations with state justice agencies
- Training for criminal justice professionals
- Expand services and programs

### **Supported Housing**

- All states implement supportive housing initiatives, including permanent supported housing and transitional housing
- Expand housing programs
- Improve integration and coordination with mental health services
- Sustainable methods for financing housing services

---

**Reference:** Southeast Mental Health Technology Transfer Center. Mental health priorities, strengths, and needs of the state mental health agencies in the southeast: Needs assessment report. Atlanta, GA, 2019. <https://mhttcnetwork.org/centers/southeast-mhttc/southeast-mhttc-final-needs-assessment-report>.
